# Supplementary material for: An Ex-Vivo Culture System of Ovarian Cancer Faithfully Recapitulating the Pathological Features of Primary Tumors
Source: PubMed Central journal article supplement (PMC6678777; doi:10.3390/cells8070644), 2019-06-26
Supplement: cells-08-00644-s001.pdf [file cells-08-00644-s001.pdf]

# Supplementary: An *Ex-Vivo* Culture System of Ovarian Cancer Faithfully Recapitulating the Pathological Features of Primary Tumors

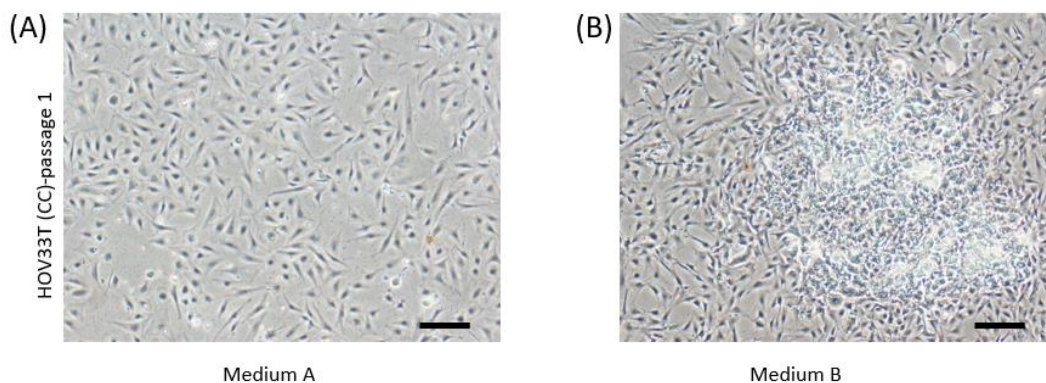

**Figure S1.** Different proliferation pattern in medium A and B. Representative images of passage 1 HOV33T cells in (A) medium A and (B) Medium B were taken under a phase-contrast microscope. Scale bar 200  $\mu\text{m}$ .

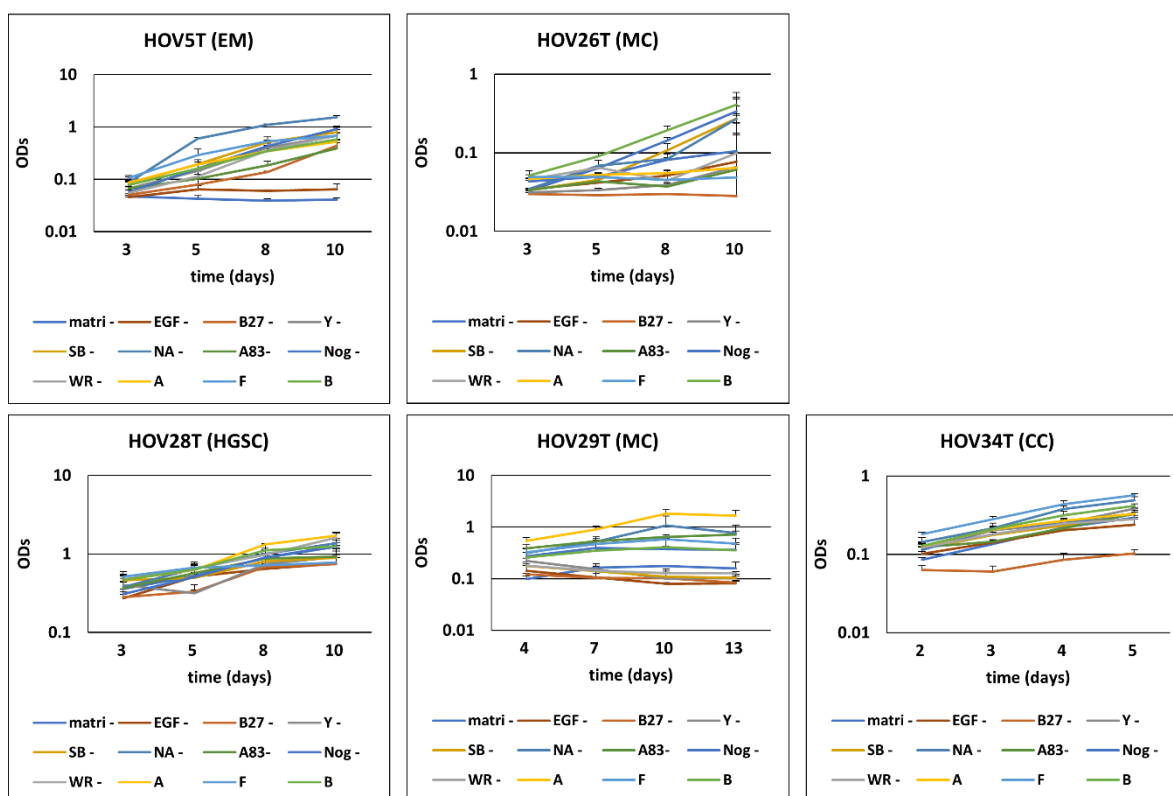

Doubling time (hours) of the cells in each condition

| Cell line                | HOV5T | HOV26T | HOV28T | HOV29T | HOV34T |
|--------------------------|-------|--------|--------|--------|--------|
| observation period (day) | 3-8   | 3-8    | 3-8    | 4-10   | 2-5    |
| matrigel-coating(-)      | -430  | 56     | 91     | 175    | 40     |
| medium B -EGF            | 299   | 207    | 96     | -177   | 59     |

|                        |    |       |     |      |     |
|------------------------|----|-------|-----|------|-----|
| medium B -B27          | 83 | 8359  | 94  | -570 | 101 |
| medium B -Y27632       | 46 | 380   | 136 | -128 | 42  |
| medium B -SB202190     | 45 | 72    | 152 | -209 | 49  |
| medium B -Nicotinamide | 33 | 95    | 86  | 81   | 41  |
| medium B -A83-01       | 81 | 805   | 96  | 191  | 51  |
| medium B -Noggin       | 48 | 131   | 77  | 315  | 46  |
| medium B -Wnt3a/RSPO1  | 41 | -2237 | 114 | -304 | 60  |
| medium B               | 56 | 63    | 96  | 221  | 37  |
| medium A               | 44 | 485   | 80  | 82   | 53  |
| F-medium               | 60 | -1069 | 252 | 172  | 44  |

**Figure S2. Cell growth curve of HOV lines in different culture conditions.** HOV5T ( $1 \times 10^3$  cells/well), HOV26T ( $1 \times 10^3$  cells/well), HOV28T ( $1 \times 10^3$  cells/well), HOV29T ( $2 \times 10^3$  cells/well) and HOV34T ( $1 \times 10^3$  cells/well) cells were seeded on matrigel-coated or uncoated (matri-) 96 well plates with the complete medium B. Next day, the complete medium B was replaced with either medium A (A), F-medium, complete medium B (B) or medium B without one component of the supplements, EGF, B27, Y27632 (Y), SB202190 (SB), nicotinamide (NA), A83-01 (A83), Noggin conditioned medium (Nog), or Wnt3A and RSPO1 conditioned medium (WR). Cells were fixed at the indicated time points, and stained by acid red to measure the relative number of cells. The calculated doubling time in each condition is also presented in the table. Minus value means the cell number rather decreased in the condition. Comparison of individual conditions was summarized in Table 2 as a heatmap.

HOV35T (MC borderline with micro invasion)

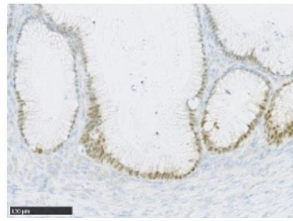

PAX8

**Figure S3. PAX8 immunostaining of original patient tissue of HOV35T.** FFPE section of HOV35T original patient tissue was stained for PAX8 as described in Materials and Methods. Scale bar 100  $\mu$ m.

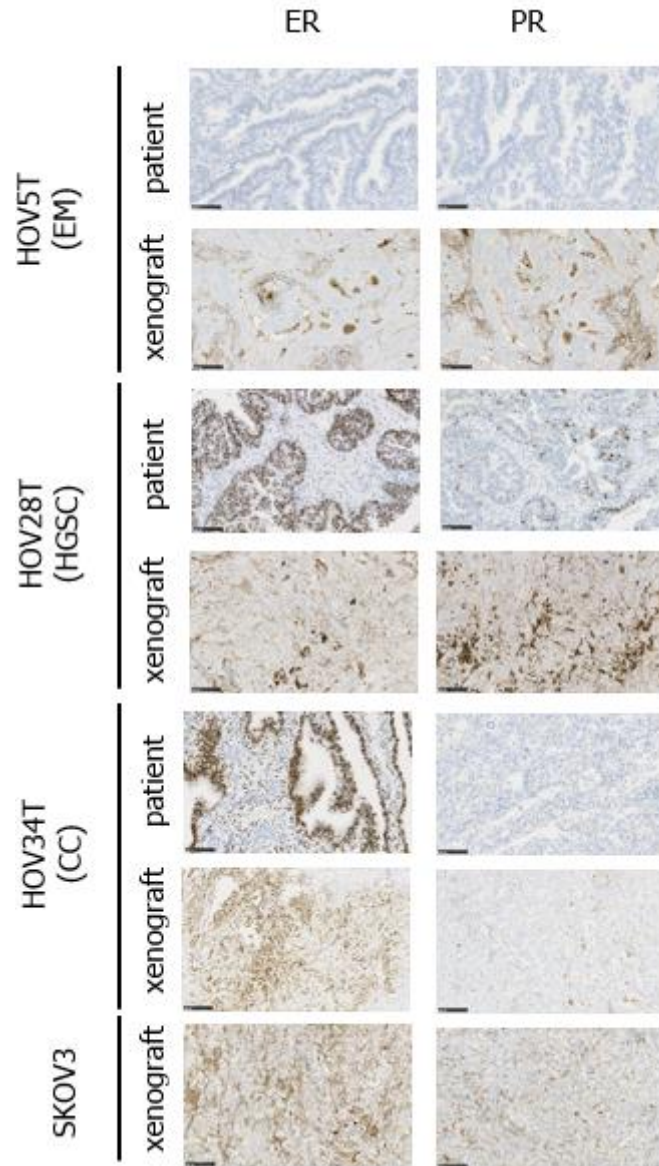

**Figure S4. Histotype-specific marker expression fidelity of HOV tumors.** FFPE sections of patient tumor tissue, HOV xenograft and SKOV3 xenograft were stained with ER (estrogen receptor) and PR (progesterone receptor). Scale bar 100  $\mu$ m.

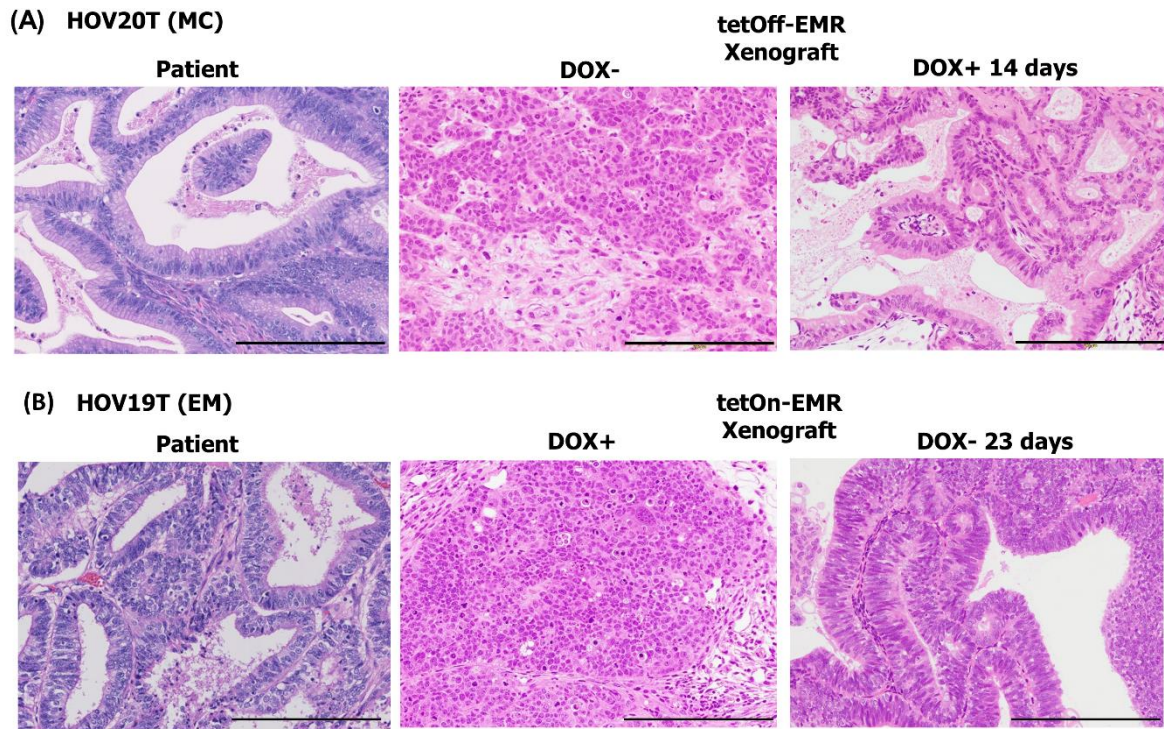

Scale bar, 200  $\mu$ m

**Figure S5.** Generation of tumors and recapitulation of original tumor tissues by temporal expression of additional oncogenes in MC and EM type HOV lines. (A) Histopathology of HOV29T/tetOFF/EMR xenograft and original tumor of HOV20T and (B) HOV19T/tetOne-EMR xenograft and original tumor.

**Table S1.** List of antibodies used for western blotting.

| <b>Antibody</b>                    | <b>Company</b>                          | <b>Catalog</b>                                              |
|------------------------------------|-----------------------------------------|-------------------------------------------------------------|
| ARID1A/BAF250A (D2A8U)             | cell signaling                          | 12354S                                                      |
| HNF 1B                             | Sigma                                   | HPA002083-100U                                              |
| PAX8                               | Proteintech                             | 10336-1-AP                                                  |
| Estrogen Receptor $\alpha$ (62A3)  | Cell Signaling                          | 2512                                                        |
| GAPDH                              | Ambion                                  | AM4300                                                      |
| E-cadherin                         | BD Transduction Lab                     | BD-610181                                                   |
| Estrogen receptor (ER alfa) (F-10) | Santa Cruz                              | sc-8002                                                     |
| Cytokeratin 7 (RCK105)             | Santa Cruz                              | sc-23876                                                    |
| WilmsTumor protein                 | abcam                                   | ab89901                                                     |
| p16INK4A                           | BD Pharmingen                           | 550834                                                      |
| TP53                               | Calbiochem (Oncogene Science) Ab6       | OP43-100UG                                                  |
| HPV16 E7(716-325)                  | Santa Cruz                              | sc-51951                                                    |
| MYC                                | Santa Cruz                              | sc-42                                                       |
| pan RAS (C-4)                      | Santa Cruz                              | sc-166691                                                   |
| HPV16 E6 (46A4)                    | Home-made, mouse monoclonal, clone 46A4 | Raised against N-terminal 16 amino acid peptide of HPV16 E6 |
| MCM7 (141.2)                       | Santa Cruz                              | sc-9966                                                     |

**Table S2.** List of antibodies, antigen retrieval methods and detection systems used for immunohistochemistry.

| Antibody   | Animal | Company name | Catalog no | Antigen retrieval |             |       | Detection                  |          |
|------------|--------|--------------|------------|-------------------|-------------|-------|----------------------------|----------|
|            |        |              |            | Solution          | Temperature | Time  | Name                       | Company  |
| PAX8       | mouse  | abcam        | ab53490    | TRSpH9            | 98°C        | 40min | Envision™ Detection System | DAKO     |
| WT1        | mouse  | DAKO         | M3561      | TRSpH9            | 98°C        | 40min | Envision™ Detection System | DAKO     |
| P16        | mouse  | BD-Phamingen | 550834     | Cit.B             | 121°C       | 10min | Envision™ Detection System | DAKO     |
| HNF1B      | goat   | Santa Cruz   | sc-7411    | TRSpH9            | 98°C        | 40min | Simple stain-PO(G)         | Nichirei |
| ARID1A     | rabbit | SIGMA        | HPA005456  | TRSpH9            | 98°C        | 40min | Envision™ Detection System | DAKO     |
| CK7        | mouse  | DAKO         | M7018      | Cit.B             | 121°C       | 10min | Envision™ Detection System | DAKO     |
| E-cadherin | mouse  | DAKO         | M3612      | TRS               | 121°C       | 10min | Envision™ Detection System | DAKO     |
| P53        | mouse  | DAKO         | M7001      | TRSpH9            | 98°C        | 40min | Envision™ Detection System | DAKO     |
| PR         | rabbit | Roche        | 518-102333 |                   |             |       | ultraViewDAB Universal Kit | Roche    |
| ER         | rabbit | Roche        | 518-107925 |                   |             |       | ultraViewDAB Universal Kit | Roche    |
